# Supplementary material
Source: PubMed Central journal article supplement (PMC4102312)
Supplement: NIHMS595493-supplement-supplement_1.pdf [file NIHMS595493-supplement-supplement_1.pdf]

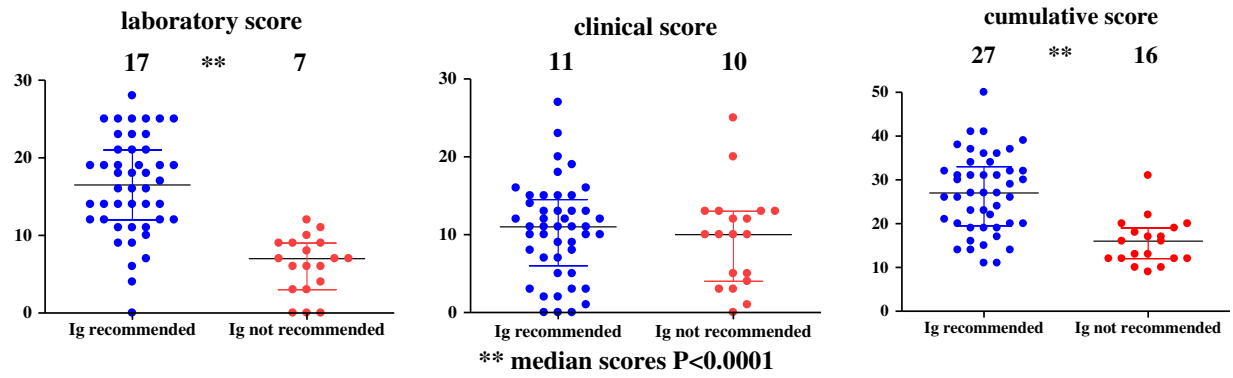

**FIG E1.** Median laboratory, clinical, and cumulative scores versus decision to start immunoglobulin (*Ig*) therapy.

**TABLE E1.** Initial laboratory and clinical history data of 65 patients

|                                                                                  | Total (n = 65) |
|----------------------------------------------------------------------------------|----------------|
| Laboratory findings on initial evaluation                                        |                |
| Median IgG (mg/dL), IQR (25% to 75%)                                             | 370 (190-565)  |
| Median IgA (mg/dL), IQR (25% to 75%)                                             | 28 (12-52)     |
| Median IgM (mg/dL), IQR (25% to 75%)                                             | 30 (12-59)     |
| No. of subjects with protective antibody titers for either tetanus or diphtheria | 38             |
| Median protective pneumococcal serotypes after vaccination                       | 14.3%          |
| Clinical findings on initial evaluation (no. of subjects with:)                  |                |
| History of upper respiratory tract infections $\geq 3/y$                         | 40             |
| $\geq 1$ Hospitalization for related issues/5 y                                  | 28             |
| $\geq 5$ or prophylactic antibiotic courses/y                                    | 30             |
| History of autoimmune disease (ITP or AIHA)                                      | 12             |
| $\geq 3$ Episodes of PNA/lifetime                                                | 11             |
| Splenomegaly or previous splenectomy                                             | 7              |
| Significant lymphadenopathy                                                      | 5              |
| History of sepsis/meningitis/osteomyelitis/empyema/septic arthritis              | 4              |
| Malabsorption, inflammatory bowel-like disease                                   | 3              |
| History of diarrhea (except <i>Clostridium difficile</i> )                       | 4              |
| Weight loss or failure to thrive                                                 | 1              |
| Radiologic findings on initial evaluation                                        |                |
| PFTs with FEV <sub>1</sub> /FVC ratio or TLC <70% of predicted value             | 1              |
| Bronchiectasis on CT                                                             | 6              |

AIHA, Autoimmune hemolytic anemia; CT, computed tomography; FVC, forced vital capacity; ITP, idiopathic thrombocytopenic purpura; PFTs, pulmonary function tests; PNA, pneumonia; TLC, total lung capacity.

**TABLE E2.** Laboratory and clinical history data of subjects according to decision to treat with immunoglobulins

|                                                                                  | Ig recommended (n = 46) | Ig not recommended (n = 19) | P value |
|----------------------------------------------------------------------------------|-------------------------|-----------------------------|---------|
| Laboratory findings on initial evaluation                                        |                         |                             |         |
| Median IgG (mg/dL), IQR (25% to 75%)                                             | 263 (159-435)           | 575 (458-658)               | <.001*  |
| Median IgA (mg/dL), IQR (25% to 75%)                                             | 17 (7-42)               | 56 (44-140)                 | <.001*  |
| Median IgM (mg/dL), IQR (25% to 75%)                                             | 21 (7-38)               | 79 (31-107)                 | <.001*  |
| No. of subjects with protective antibody titers for either tetanus or diphtheria | 20                      | 18                          | .0001†  |
| Median protective pneumococcal serotypes after vaccination                       | 7.1%                    | 35.7%                       | .0034*  |
| Clinical findings on initial evaluation (no. of subjects with:)                  |                         |                             |         |
| History of upper respiratory tract infections $\geq 3/y$                         | 28                      | 12                          | 1.0000  |
| $\geq 1$ Hospitalization for related issues/5 y                                  | 21                      | 7                           | .5891   |
| $\geq 5$ Prophylactic antibiotic courses/y                                       | 19                      | 11                          | .2786   |
| History of autoimmune disease (ITP or AIHA)                                      | 12                      | 0                           | .0131†  |
| $\geq 3$ Episodes of PNA/lifetime                                                | 9                       | 2                           | .4857   |
| Splenomegaly or previous splenectomy                                             | 7                       | 0                           | .0960   |
| Significant lymphadenopathy                                                      | 5                       | 0                           | .3104   |
| History of sepsis/meningitis/osteomyelitis/empyema/septic arthritis              | 3                       | 1                           | 1.0000  |
| Malabsorption, inflammatory bowel-like disease                                   | 2                       | 1                           | 1.0000  |
| History of diarrhea (except <i>Clostridium difficile</i> )                       | 1                       | 3                           | .0716   |
| Weight loss or failure to thrive                                                 | 1                       | 0                           | 1.0000  |
| Radiologic findings on initial evaluation                                        |                         |                             |         |
| PFTs with FEV <sub>1</sub> /FVC ratio or TLC <70% of predicted value             | 1                       | 0                           | 1.0000  |
| Bronchiectasis on CT                                                             | 6                       | 0                           | .1688   |

AIHA, Autoimmune hemolytic anemia; CT, computed tomography; FVC, forced vital capacity; Ig, immunoglobulin; ITP, idiopathic thrombocytopenic purpura; PFTs, pulmonary function tests; PNA, pneumonia; TLC, total lung capacity.

\*Significant as per the Mann-Whitney U test.

†Significant as per the Fisher exact test.
